# Supplementary material
Source: PubMed Central journal article supplement (PMC2749469)
Supplement: NIHMS132601-supplement-1_si_001.pdf [file NIHMS132601-supplement-1_si_001.pdf]

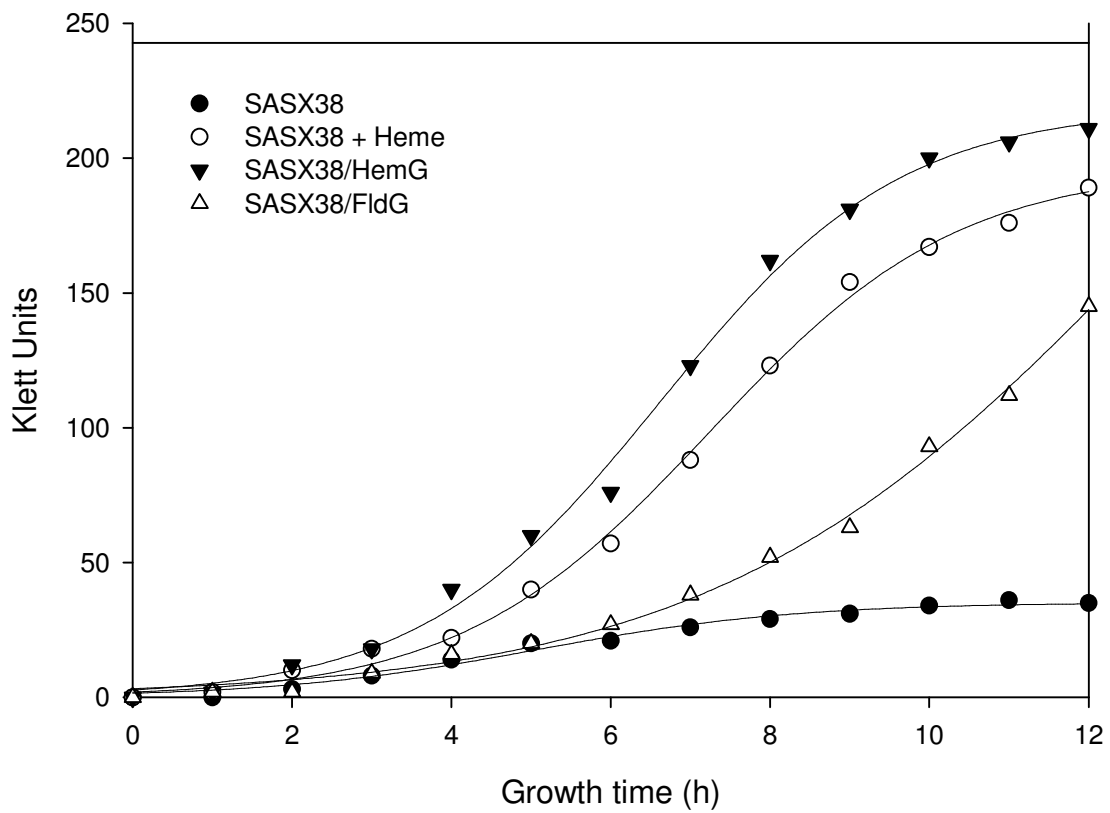

Supplementary figure 1. Complementation analysis of chimeric FldG. SAS38X cells are able to grow only when given heme or functional protoporphyrinogen oxidase. Cells containing FldG have restored, but slow, growth compared to control cells. Initial growth is due to residual heme in inoculum.
